# Supplementary material for: Hepatitis B Core-Related Antigen Is Useful for Predicting Phase and Prognosis of Hepatitis B e Antigen-Positive Patients
Source: MDPI journal article supplement (doi:10.3390/jcm11061729), 2022-03-21

**Supplementary Table S1.** Baseline characteristics of HBeAg-positive and negative patients

| Variables                            | HBeAg positive patients (n=243, 62.8%) | HBeAg negative patients (n=144, 37.2%) | <i>P</i> value |
|--------------------------------------|----------------------------------------|----------------------------------------|----------------|
| Age, years                           | 37.6 ± 12.4                            | 46.0 ± 10.3                            | <0.001         |
| Male, n (%)                          | 160 (65.8)                             | 100 (69.4)                             | 0.466          |
| Diabetes, n (%)                      | 10 (4.1)                               | 13 (9.0)                               | 0.048          |
| Platelet count, × 10 <sup>9</sup> /L | 187.9 ± 57.1                           | 167.2 ± 48.4                           | <0.001         |
| PT INR                               | 1.06 ± 0.09                            | 1.07 ± 0.10                            | 0.090          |
| Alanine aminotransferase, IU/L       | 195.0 ± 230.8                          | 150.8 ± 245.3                          | 0.076          |
| Bilirubin, mg/dL                     | 0.77 ± 0.48                            | 0.93 ± 1.98                            | 0.218          |
| Albumin, g/dL                        | 4.0 ± 0.7                              | 4.0 ± 0.4                              | 0.802          |
| AFP, ng/mL                           | 15.7 ± 54.3                            | 10.5 ± 29.9                            | 0.302          |
| HBV DNA, log IU/mL                   | 7.3 ± 1.2                              | 5.2 ± 2.0                              | <0.001         |
| HBsAg, log IU/mL                     | 6.9 ± 0.6                              | 5.1 ± 2.6                              | <0.001         |
| HBcrAg, log U/mL                     | 7.7 ± 1.0                              | 5.1 ± 1.5                              | <0.001         |

Variables are expressed as mean ± standard deviation or n (%). HBeAg, hepatitis B e antigen; INR, international normalized ratio; HBV, hepatitis B virus; HBsAg, hepatitis B surface antigen; HBcrAg, hepatitis B core-related antigen

**Supplementary Table S2.** Predictors for inactive phase in HBeAg-negative patients

| Variables                | Rating          | Univariate | Multivariate |                         |         |
|--------------------------|-----------------|------------|--------------|-------------------------|---------|
|                          |                 | P value    | Hazard ratio | 95% confidence interval | P value |
| Age                      | years           | 0.174      |              |                         |         |
| Male sex                 |                 | 0.667      |              |                         |         |
| Diabetes                 | 0=no; 1=yes     | 0.807      |              |                         |         |
| Platelet count           | $\times 10^9/L$ | 0.010      | 1.009        | 0.997-1.022             | 0.152   |
| PT INR                   |                 | 0.370      |              |                         |         |
| Alanine aminotransferase | IU/L            | 0.196      |              |                         |         |
| Bilirubin                | mg/dL           | 0.301      |              |                         |         |
| HBV DNA                  | log IU/mL       | <0.001     | 0.643        | 0.456-0.905             | 0.011   |
| HBsAg                    | log IU/mL       | 0.858      |              |                         |         |
| HBcrAg                   | log U/mL        | 0.001      | 0.735        | 0.438-1.234             | 0.244   |

HBeAg, hepatitis B e antigen; INR, international normalized ratio; HBV, hepatitis B virus; HBsAg, hepatitis B surface antigen; HBcrAg, hepatitis B core-related antigen

**Supplementary Figure S1. Flowchart of patients**

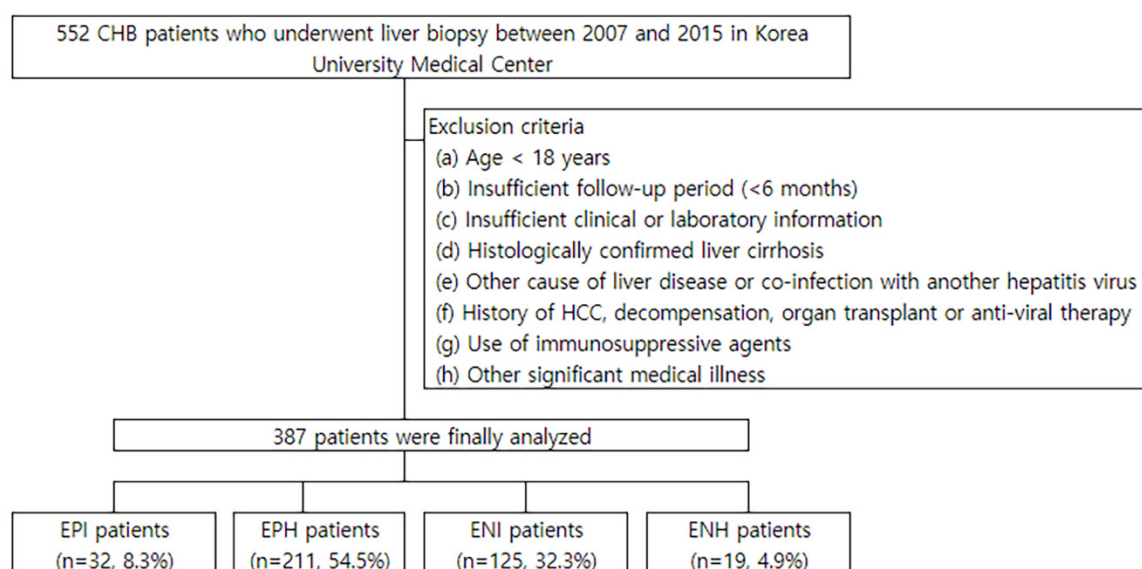

Supplement: s1 [file s1]
